# Supplementary material for: Centromere Architecture Breakdown Induced by the Viral E3 Ubiquitin Ligase ICP0 Protein of Herpes Simplex Virus Type 1
Source: PubMed Central journal article supplement (PMC3447814; doi:10.1371/journal.pone.0044227), 2012-09-20
Supplement: pone.0044227.s001.pdf [file pone.0044227.s001.pdf]

**Octo-nucleosomes**

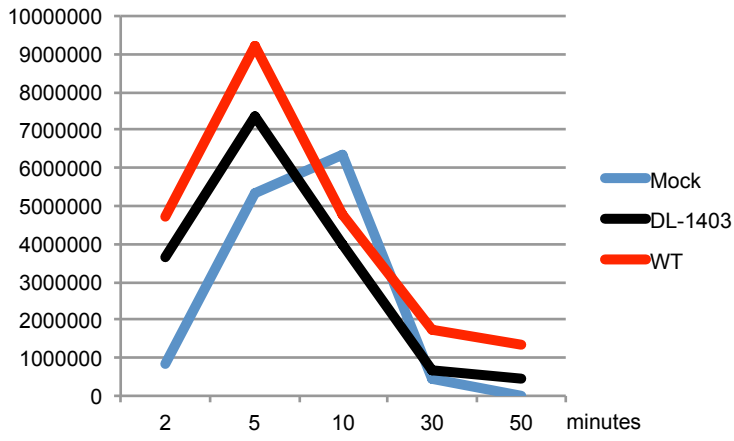

**Hepta-nucleosomes**

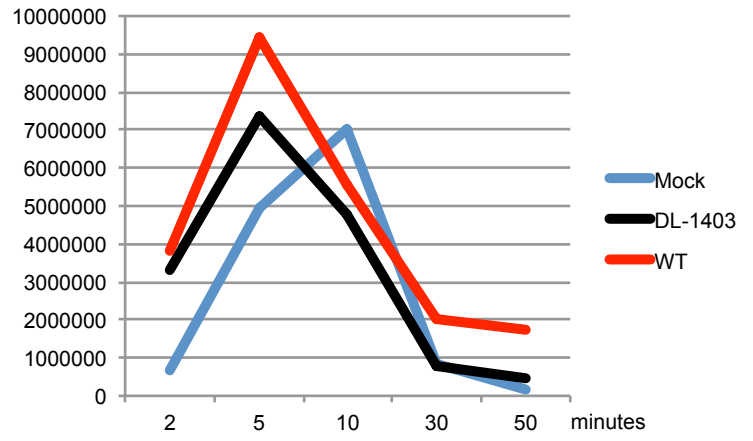

**Hexa-nucleosomes**

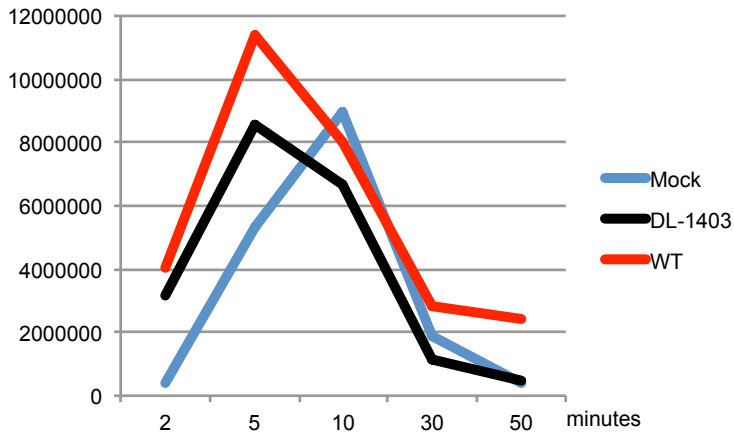

**Penta-nucleosomes**

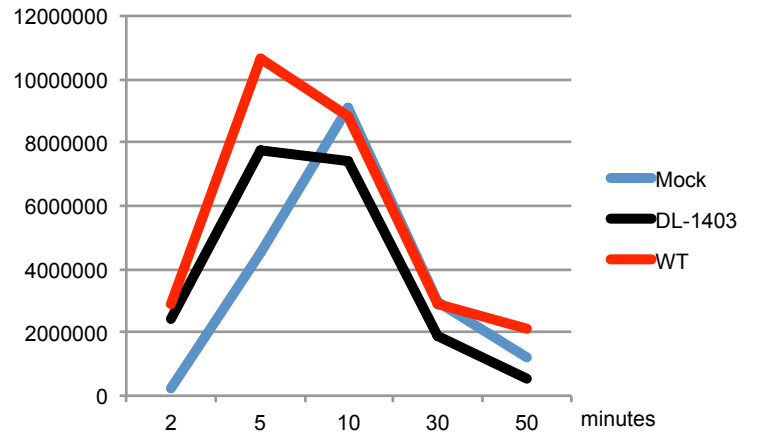

FIGURE S1- Gross *et al.*
