# Supplementary material for: Centromere Architecture Breakdown Induced by the Viral E3 Ubiquitin Ligase ICP0 Protein of Herpes Simplex Virus Type 1
Source: PubMed Central journal article supplement (PMC3447814; doi:10.1371/journal.pone.0044227), 2012-09-20
Supplement: pone.0044227.s002.pdf [file pone.0044227.s002.pdf]

Total chromatin (Ethidium Bromide)

Centromeric chromatin (SB)

Ratios of Mono and Di-nucleosomes over LMW -30 min

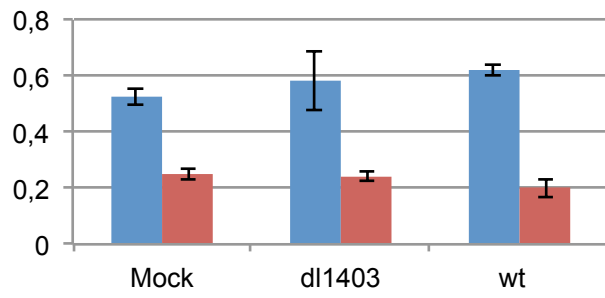

Ratios of Mono and Di-nucleosomes over LMW -30 min

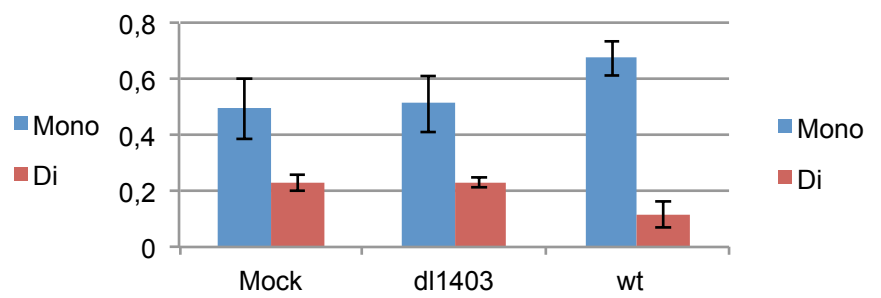

Ratios of Mono and Di-nucleosomes over LMW -50 min

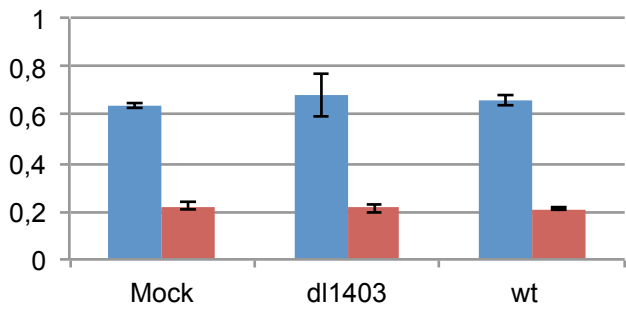

Ratios of Mono and Di-nucleosomes over LMW -50 min

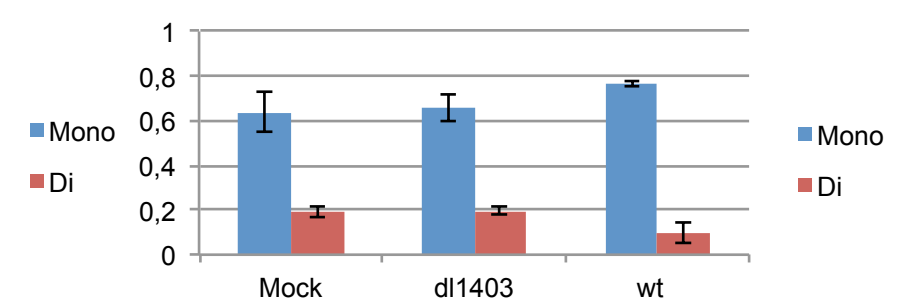

FIGURE S2- Gross *et al.*
